# Supplementary material for: Single-Beam Acoustic Tweezer Prepared by Lead-Free KNN-Based Textured Ceramics
Source: Micromachines (Basel). 2022 Jan 25;13(2):175. doi: 10.3390/mi13020175 (PMC8879455; doi:10.3390/mi13020175)
Supplement: Supplementary file 1 [file micromachines-13-00175-s001.zip]

Archive with 4 entries (4 files):
- Supplementary Materials.pdf
- Video S1.mp4
- Video S2.mp4
- Video S3.mp4
